## Maternal activation of gap genes in the hover fly *Episyrphus*

**Steffen Lemke, Stephanie E. Busch, Dionysios A. Antonopoulos, Folker Meyer, Marc H. Domanus and Urs Schmidt-Ott**

There was an error published in *Development* **137**, 1709-1719.

The Accession Numbers published in Table S1 online were incorrect. The correct version of the table is now available online.

We apologise to authors and readers for this error.
